# Supplementary material for: The Protective Role of 28-Homobrassinolide and Glomus versiforme in Cucumber to Withstand Saline Stress
Source: PubMed Central journal article supplement (PMC7020224; doi:10.3390/plants9010042), 2019-12-26
Supplement: plants-09-00042-s001.pdf [file plants-09-00042-s001.pdf]

Supplementary materials (ANOVA)

**S1a: Analysis of Variance Table for plant length (Cv Jinyou #1)**

| Source             | DF | SS      | MS      | F      | P      |
|--------------------|----|---------|---------|--------|--------|
| r                  | 2  | 25.69   | 12.85   |        |        |
| salt               | 1  | 4320.17 | 4320.17 | 278.47 | 0.0036 |
| Error r*salt       | 2  | 31.03   | 15.51   |        |        |
| Treat              | 3  | 254.07  | 84.69   | 4.78   | 0.0204 |
| salt*Treat         | 3  | 25.09   | 8.36    | 0.47   | 0.1074 |
| Error r*salt*Treat | 12 | 212.61  | 17.72   |        |        |
| Total              | 23 | 4868.67 |         |        |        |

Grand Mean 84.910

CV(r\*salt) 4.64

CV(r\*salt\*Treat) 4.96

**S2a: Analysis of Variance Table for Root length (Cv Jinyou #1)**

| Source             | DF | SS      | MS      | F       | P      |
|--------------------|----|---------|---------|---------|--------|
| r                  | 2  | 42.03   | 21.015  |         |        |
| salt               | 1  | 850.37  | 850.374 | 4085.15 | 0.0002 |
| Error r*salt       | 2  | 0.42    | 0.208   |         |        |
| Treat              | 3  | 115.27  | 38.422  | 3.56    | 0.0474 |
| salt*Treat         | 3  | 87.90   | 29.300  | 2.72    | 0.0713 |
| Error r*salt*Treat | 12 | 129.41  | 10.784  |         |        |
| Total              | 23 | 1225.40 |         |         |        |

Grand Mean 47.870

CV(r\*salt) 0.95

CV(r\*salt\*Treat) 6.86

**S3a: Analysis of Variance Table for Shoot fresh weight (Cv Jinyou #1)**

| Source             | DF | SS      | MS      | F      | P      |
|--------------------|----|---------|---------|--------|--------|
| r                  | 2  | 83.7    | 41.8    |        |        |
| salt               | 1  | 12795.6 | 12795.6 | 331.17 | 0.0030 |
| Error r*salt       | 2  | 77.3    | 38.6    |        |        |
| Treat              | 3  | 1970.9  | 657.0   | 11.40  | 0.0008 |
| salt*Treat         | 3  | 880.7   | 293.6   | 5.09   | 0.0168 |
| Error r*salt*Treat | 12 | 691.8   | 57.7    |        |        |
| Total              | 23 | 16499.9 |         |        |        |

Grand Mean 96.133

CV(r\*salt) 6.47

CV(r\*salt\*Treat) 7.90

**S4a: Analysis of Variance Table for Shoot dry weight (Cv Jinyou #1)**

| Source             | DF | SS      | MS      | F      | P      |
|--------------------|----|---------|---------|--------|--------|
| r                  | 2  | 39.394  | 19.697  |        |        |
| salt               | 1  | 266.267 | 266.267 | 169.38 | 0.0059 |
| Error r*salt       | 2  | 3.144   | 1.572   |        |        |
| Treat              | 3  | 51.337  | 17.112  | 3.68   | 0.0436 |
| salt*Treat         | 3  | 4.067   | 1.356   | 0.29   | 0.8309 |
| Error r*salt*Treat | 12 | 55.851  | 4.654   |        |        |
| Total              | 23 | 420.059 |         |        |        |

Grand Mean 13.873

CV(r\*salt) 9.04  
CV(r\*salt\*Treat) 15.55

**S5a: Analysis of Variance Table for Root fresh weight (Cv Jinyou #1)**

| Source             | DF | SS      | MS      | F     | P      |
|--------------------|----|---------|---------|-------|--------|
| r                  | 2  | 1.830   | 0.915   |       |        |
| salt               | 1  | 405.000 | 405.000 | 48.42 | 0.0200 |
| Error r*salt       | 2  | 16.728  | 8.364   |       |        |
| Treat              | 3  | 62.290  | 20.763  | 4.50  | 0.0245 |
| salt*Treat         | 3  | 15.139  | 5.046   | 1.09  | 0.3891 |
| Error r*salt*Treat | 12 | 55.334  | 4.611   |       |        |
| Total              | 23 | 556.321 |         |       |        |

Grand Mean 15.617  
CV(r\*salt) 18.52  
CV(r\*salt\*Treat) 13.75

**S6a: Analysis of Variance Table for Root dry weight (Cv Jinyou #1)**

| Source             | DF | SS      | MS      | F      | P      |
|--------------------|----|---------|---------|--------|--------|
| r                  | 2  | 0.2379  | 0.1190  |        |        |
| salt               | 1  | 25.6473 | 25.6473 | 100.59 | 0.0098 |
| Error r*salt       | 2  | 0.5099  | 0.2550  |        |        |
| Treat              | 3  | 2.5374  | 0.8458  | 4.22   | 0.0297 |
| salt*Treat         | 3  | 0.2144  | 0.0715  | 0.36   | 0.7854 |
| Error r*salt*Treat | 12 | 2.4062  | 0.2005  |        |        |
| Total              | 23 | 31.5533 |         |        |        |

Grand Mean 2.3088  
CV(r\*salt) 21.87  
CV(r\*salt\*Treat) 19.40

**S7a: Analysis of Variance Table for Chl a (Cv Jinyou #1)**

| Source             | DF | SS      | MS      | F      | P      |
|--------------------|----|---------|---------|--------|--------|
| r                  | 2  | 0.1078  | 0.0539  |        |        |
| salt               | 1  | 32.4242 | 32.4242 | 164.66 | 0.0060 |
| Error r*salt       | 2  | 0.3938  | 0.1969  |        |        |
| Treat              | 3  | 15.3368 | 5.1123  | 32.09  | 0.0000 |
| salt*Treat         | 3  | 7.1457  | 2.3819  | 14.95  | 0.0002 |
| Error r*salt*Treat | 12 | 1.9119  | 0.1593  |        |        |
| Total              | 23 | 57.3203 |         |        |        |

Grand Mean 15.810  
CV(r\*salt) 2.81  
CV(r\*salt\*Treat) 2.52

**S8a: Analysis of Variance Table for chl b (Cv Jinyou #1)**

| Source             | DF | SS      | MS      | F       | P      |
|--------------------|----|---------|---------|---------|--------|
| r                  | 2  | 0.0390  | 0.0195  |         |        |
| salt               | 1  | 10.4830 | 10.4830 | 2214.83 | 0.0005 |
| Error r*salt       | 2  | 0.0095  | 0.0047  |         |        |
| Treat              | 3  | 1.8355  | 0.6118  | 20.51   | 0.0001 |
| salt*Treat         | 3  | 0.8517  | 0.2839  | 9.52    | 0.0017 |
| Error r*salt*Treat | 12 | 0.3580  | 0.0298  |         |        |
| Total              | 23 | 13.5768 |         |         |        |

Grand Mean 3.7937

CV(r\*salt) 1.81  
 CV(r\*salt\*Treat) 4.55

**S9a: Analysis of Variance Table for total chl (Cv Jinyou #1)**

| Source             | DF | SS      | MS      | F      | P      |
|--------------------|----|---------|---------|--------|--------|
| r                  | 2  | 0.073   | 0.0364  |        |        |
| salt               | 1  | 79.780  | 79.7801 | 325.51 | 0.0031 |
| Error r*salt       | 2  | 0.490   | 0.2451  |        |        |
| Treat              | 3  | 27.663  | 9.2209  | 63.88  | 0.0000 |
| salt*Treat         | 3  | 12.369  | 4.1231  | 28.56  | 0.0000 |
| Error r*salt*Treat | 12 | 1.732   | 0.1443  |        |        |
| Total              | 23 | 122.107 |         |        |        |

Grand Mean 19.603  
 CV(r\*salt) 2.53  
 CV(r\*salt\*Treat) 1.94

**S10a: Analysis of Variance Table for Root activity (Cv Jinyou #1)**

| Source             | DF | SS      | MS      | F      | P      |
|--------------------|----|---------|---------|--------|--------|
| r                  | 2  | 0.012   | 0.006   |        |        |
| salt               | 1  | 508.355 | 508.355 | 456.80 | 0.0022 |
| Error r*salt       | 2  | 2.226   | 1.113   |        |        |
| Treat              | 3  | 29.895  | 9.965   | 14.75  | 0.0002 |
| salt*Treat         | 3  | 6.892   | 2.297   | 3.40   | 0.0535 |
| Error r*salt*Treat | 12 | 8.108   | 0.676   |        |        |
| Total              | 23 | 555.487 |         |        |        |

Grand Mean 17.948  
 CV(r\*salt) 5.88  
 CV(r\*salt\*Treat) 4.58

**S11a: Analysis of Variance Table for Electrolyte leakage after 20 days (Cv Jinyou #1)**

| Source             | DF | SS      | MS      | F       | P      |
|--------------------|----|---------|---------|---------|--------|
| r                  | 2  | 3.02    | 1.51    |         |        |
| salt               | 1  | 1130.98 | 1130.98 | 1734.05 | 0.0006 |
| Error r*salt       | 2  | 1.30    | 0.65    |         |        |
| Treat              | 3  | 65.70   | 21.90   | 11.65   | 0.0007 |
| salt*Treat         | 3  | 129.57  | 43.19   | 22.98   | 0.0000 |
| Error r*salt*Treat | 12 | 22.56   | 1.88    |         |        |
| Total              | 23 | 1353.13 |         |         |        |

Grand Mean 20.459  
 CV(r\*salt) 3.95  
 CV(r\*salt\*Treat) 6.70

**S12a: Analysis of Variance Table for Electrolyte leakage after 40 days (Cv Jinyou #1)**

| Source             | DF | SS      | MS      | F      | P      |
|--------------------|----|---------|---------|--------|--------|
| r                  | 2  | 2.07    | 1.036   |        |        |
| salt               | 1  | 865.84  | 865.836 | 270.12 | 0.0037 |
| Error r*salt       | 2  | 6.41    | 3.205   |        |        |
| Treat              | 3  | 127.95  | 42.649  | 67.66  | 0.0000 |
| salt*Treat         | 3  | 69.16   | 23.052  | 36.57  | 0.0000 |
| Error r*salt*Treat | 12 | 7.56    | 0.630   |        |        |
| Total              | 23 | 1078.99 |         |        |        |

Grand Mean 13.287  
 CV(r\*salt) 13.47  
 CV(r\*salt\*Treat) 5.98

**S13a: Analysis of Variance Table for Leaf relative water content after 20 days (Cv Jinyou #1)**

| Source             | DF | SS      | MS      | F       | P      |
|--------------------|----|---------|---------|---------|--------|
| r                  | 2  | 36.25   | 18.124  |         |        |
| salt               | 1  | 950.44  | 950.444 | 1467.93 | 0.0007 |
| Error r*salt       | 2  | 1.29    | 0.647   |         |        |
| Treat              | 3  | 542.01  | 180.669 | 36.34   | 0.0000 |
| salt*Treat         | 3  | 72.98   | 24.328  | 4.89    | 0.0190 |
| Error r*salt*Treat | 12 | 59.66   | 4.972   |         |        |
| Total              | 23 | 1662.64 |         |         |        |

Grand Mean 73.229  
 CV(r\*salt) 1.10  
 CV(r\*salt\*Treat) 3.04

**S14a: Analysis of Variance Table for Leaf relative water content after 40 days (Cv Jinyou #1)**

| Source             | DF | SS      | MS      | F      | P      |
|--------------------|----|---------|---------|--------|--------|
| r                  | 2  | 36.57   | 18.29   |        |        |
| salt               | 1  | 2861.30 | 2861.30 | 267.21 | 0.0037 |
| Error r*salt       | 2  | 21.42   | 10.71   |        |        |
| Treat              | 3  | 131.51  | 43.84   | 16.83  | 0.0001 |
| salt*Treat         | 3  | 32.03   | 10.68   | 4.10   | 0.0322 |
| Error r*salt*Treat | 12 | 31.25   | 2.60    |        |        |
| Total              | 23 | 3114.08 |         |        |        |

Grand Mean 49.126  
 CV(r\*salt) 6.66  
 CV(r\*salt\*Treat) 3.28

**S15a: Analysis of Variance Table for photosynthesis (Cv Jinyou #1)**

| Source             | DF | SS      | MS      | F       | P      |
|--------------------|----|---------|---------|---------|--------|
| r                  | 2  | 1.1078  | 0.5539  |         |        |
| salt               | 1  | 20.5350 | 20.5350 | 5457.81 | 0.0002 |
| Error r*salt       | 2  | 0.0075  | 0.0038  |         |        |
| Treat              | 3  | 1.5649  | 0.5216  | 1.67    | 0.2252 |
| salt*Treat         | 3  | 0.6769  | 0.2256  | 0.72    | 0.5568 |
| Error r*salt*Treat | 12 | 3.7388  | 0.3116  |         |        |
| Total              | 23 | 27.6309 |         |         |        |

Grand Mean 5.3267  
 CV(r\*salt) 1.15  
 CV(r\*salt\*Treat) 10.48

**S16a: Analysis of Variance Table for stomatal conductance (Cv Jinyou #1)**

| Source       | DF | SS      | MS      | F       | P      |
|--------------|----|---------|---------|---------|--------|
| r            | 2  | 0.00028 | 0.00014 |         |        |
| salt         | 1  | 0.10868 | 0.10868 | 1187.18 | 0.0008 |
| Error r*salt | 2  | 0.00018 | 0.00009 |         |        |
| Treat        | 3  | 0.00648 | 0.00216 | 2.31    | 0.1281 |

|                    |    |         |         |      |        |
|--------------------|----|---------|---------|------|--------|
| salt*Treat         | 3  | 0.00086 | 0.00029 | 0.31 | 0.8207 |
| Error r*salt*Treat | 12 | 0.01123 | 0.00094 |      |        |
| Total              | 23 | 0.12771 |         |      |        |

Grand Mean 0.1918  
CV(r\*salt) 4.99  
CV(r\*salt\*Treat) 15.95

**S17a: Analysis of Variance Table for intercellular Carbon dioxide conc. (Cv Jinyou #1)**

| Source             | DF | SS      | MS      | F       | P      |
|--------------------|----|---------|---------|---------|--------|
| r                  | 2  | 27.77   | 13.89   |         |        |
| salt               | 1  | 4743.28 | 4743.28 | 2461.91 | 0.0004 |
| Error r*salt       | 2  | 3.85    | 1.93    |         |        |
| Treat              | 3  | 544.12  | 181.37  | 19.60   | 0.0001 |
| salt*Treat         | 3  | 79.88   | 26.63   | 2.88    | 0.0802 |
| Error r*salt*Treat | 12 | 111.06  | 9.26    |         |        |
| Total              | 23 | 5509.98 |         |         |        |

Grand Mean 379.06  
CV(r\*salt) 0.37  
CV(r\*salt\*Treat) 0.80

**S18a: Analysis of Variance Table for transpiration rate (Cv Jinyou #1)**

| Source             | DF | SS      | MS      | F       | P      |
|--------------------|----|---------|---------|---------|--------|
| r                  | 2  | 0.0181  | 0.0090  |         |        |
| salt               | 1  | 12.0706 | 12.0706 | 31797.6 | 0.0000 |
| Error r*salt       | 2  | 0.0008  | 0.0004  |         |        |
| Treat              | 3  | 0.6291  | 0.2097  | 42.19   | 0.0000 |
| salt*Treat         | 3  | 0.2374  | 0.0791  | 15.92   | 0.0002 |
| Error r*salt*Treat | 12 | 0.0596  | 0.0050  |         |        |
| Total              | 23 | 13.0155 |         |         |        |

Grand Mean 1.5014  
CV(r\*salt) 1.30  
CV(r\*salt\*Treat) 4.70

**S19a: Analysis of Variance Table for Superoxide dismutase (SOD) after 10 days (Cv Jinyou #1)**

| Source             | DF | SS      | MS      | F      | P      |
|--------------------|----|---------|---------|--------|--------|
| r                  | 2  | 4676.6  | 2338.3  |        |        |
| salt               | 1  | 62899.8 | 62899.8 | 103.56 | 0.0095 |
| Error r*salt       | 2  | 1214.8  | 607.4   |        |        |
| Treat              | 3  | 10356.3 | 3452.1  | 5.11   | 0.0165 |
| salt*Treat         | 3  | 8379.8  | 2793.3  | 4.14   | 0.0314 |
| Error r*salt*Treat | 12 | 8100.6  | 675.1   |        |        |
| Total              | 23 | 95627.9 |         |        |        |

Grand Mean 378.98  
CV(r\*salt) 6.50  
CV(r\*salt\*Treat) 6.86

**S20a: Analysis of Variance Table for Superoxide dismutase (SOD) after 20 days (Cv Jinyou #1)**

| Source | DF | SS   | MS   | F | P |
|--------|----|------|------|---|---|
| r      | 2  | 2889 | 1445 |   |   |

|                    |    |        |        |         |        |
|--------------------|----|--------|--------|---------|--------|
| salt               | 1  | 321878 | 321878 | 2174.11 | 0.0005 |
| Error r*salt       | 2  | 296    | 148    |         |        |
| Treat              | 3  | 11790  | 3930   | 3.22    | 0.0613 |
| salt*Treat         | 3  | 8279   | 2760   | 2.26    | 0.1336 |
| Error r*salt*Treat | 12 | 14643  | 1220   |         |        |
| Total              | 23 | 359775 |        |         |        |

Grand Mean 464.05  
 CV(r\*salt) 2.62  
 CV(r\*salt\*Treat) 7.53

**S21a: Analysis of Variance Table for Superoxide dismutase (SOD) after 30 days (Cv Jinyou #1)**

| Source             | DF | SS     | MS     | F      | P      |
|--------------------|----|--------|--------|--------|--------|
| r                  | 2  | 3264   | 1632   |        |        |
| salt               | 1  | 339116 | 339116 | 280.39 | 0.0035 |
| Error r*salt       | 2  | 2419   | 1209   |        |        |
| Treat              | 3  | 5829   | 1943   | 1.77   | 0.2067 |
| salt*Treat         | 3  | 3707   | 1236   | 1.12   | 0.3780 |
| Error r*salt*Treat | 12 | 13189  | 1099   |        |        |
| Total              | 23 | 367524 |        |        |        |

Grand Mean 464.96  
 CV(r\*salt) 7.48  
 CV(r\*salt\*Treat) 7.13

**S22a: Analysis of Variance Table for Superoxide dismutase (SOD) after 40 days (Cv Jinyou #1)**

| Source             | DF | SS     | MS     | F      | P      |
|--------------------|----|--------|--------|--------|--------|
| r                  | 2  | 25     | 13     |        |        |
| salt               | 1  | 284511 | 284511 | 136.54 | 0.0072 |
| Error r*salt       | 2  | 4168   | 2084   |        |        |
| Treat              | 3  | 7461   | 2487   | 2.08   | 0.1560 |
| salt*Treat         | 3  | 7054   | 2351   | 1.97   | 0.1725 |
| Error r*salt*Treat | 12 | 14328  | 1194   |        |        |
| Total              | 23 | 317546 |        |        |        |

Grand Mean 458.74  
 CV(r\*salt) 9.95  
 CV(r\*salt\*Treat) 7.53

**S23a: Analysis of Variance Table for Peroxidase (POD) after 10 days (Cv Jinyou #1)**

| Source             | DF | SS      | MS      | F       | P      |
|--------------------|----|---------|---------|---------|--------|
| r                  | 2  | 538     | 269     |         |        |
| salt               | 1  | 1072627 | 1072627 | 2991.85 | 0.0003 |
| Error r*salt       | 2  | 717     | 359     |         |        |
| Treat              | 3  | 27457   | 9152    | 5.63    | 0.0121 |
| salt*Treat         | 3  | 8912    | 2971    | 1.83    | 0.1961 |
| Error r*salt*Treat | 12 | 19522   | 1627    |         |        |
| Total              | 23 | 1129774 |         |         |        |

Grand Mean 945.62  
 CV(r\*salt) 2.00  
 CV(r\*salt\*Treat) 4.27

**S24a: Analysis of Variance Table for Peroxidase (POD) after 20 days (Cv Jinyou #1)**

| Source             | DF | SS      | MS      | F       | P      |
|--------------------|----|---------|---------|---------|--------|
| r                  | 2  | 3962    | 1981    |         |        |
| salt               | 1  | 1354302 | 1354302 | 1808.09 | 0.0006 |
| Error r*salt       | 2  | 1498    | 749     |         |        |
| Treat              | 3  | 19999   | 6666    | 6.32    | 0.0081 |
| salt*Treat         | 3  | 14842   | 4947    | 4.69    | 0.0217 |
| Error r*salt*Treat | 12 | 12662   | 1055    |         |        |
| Total              | 23 | 1407264 |         |         |        |

Grand Mean 996.02

CV(r\*salt) 2.75

CV(r\*salt\*Treat) 3.26

**S25a: Analysis of Variance Table for Peroxidase (POD) after 30 days (Cv Jinyou #1)**

| Source             | DF | SS      | MS      | F       | P      |
|--------------------|----|---------|---------|---------|--------|
| r                  | 2  | 1642    | 821     |         |        |
| salt               | 1  | 1212157 | 1212157 | 3033.95 | 0.0003 |
| Error r*salt       | 2  | 799     | 400     |         |        |
| Treat              | 3  | 9950    | 3317    | 2.07    | 0.1571 |
| salt*Treat         | 3  | 7642    | 2547    | 1.59    | 0.2426 |
| Error r*salt*Treat | 12 | 19184   | 1599    |         |        |
| Total              | 23 | 1251375 |         |         |        |

Grand Mean 991.21

CV(r\*salt) 2.02

CV(r\*salt\*Treat) 4.03

**S26a: Analysis of Variance Table for Peroxidase (POD) after 40 days (Cv Jinyou #1)**

| Source             | DF | SS      | MS      | F      | P      |
|--------------------|----|---------|---------|--------|--------|
| r                  | 2  | 510     | 255     |        |        |
| salt               | 1  | 1217865 | 1217865 | 670.09 | 0.0015 |
| Error r*salt       | 2  | 3635    | 1817    |        |        |
| Treat              | 3  | 21132   | 7044    | 7.59   | 0.0042 |
| salt*Treat         | 3  | 6869    | 2290    | 2.47   | 0.1123 |
| Error r*salt*Treat | 12 | 11144   | 929     |        |        |
| Total              | 23 | 1261154 |         |        |        |

Grand Mean 1017.8

CV(r\*salt) 4.19

CV(r\*salt\*Treat) 2.99

**S27a: Analysis of Variance Table for Catalase (CAT) after 10 days (Cv Jinyou #1)**

| Source             | DF | SS     | MS     | F      | P      |
|--------------------|----|--------|--------|--------|--------|
| r                  | 2  | 206    | 103    |        |        |
| salt               | 1  | 137901 | 137901 | 109.71 | 0.0090 |
| Error r*salt       | 2  | 2514   | 1257   |        |        |
| Treat              | 3  | 1353   | 451    | 0.24   | 0.8655 |
| salt*Treat         | 3  | 1420   | 473    | 0.25   | 0.8573 |
| Error r*salt*Treat | 12 | 22391  | 1866   |        |        |
| Total              | 23 | 165785 |        |        |        |

Grand Mean 417.48  
 CV(r\*salt) 8.49  
 CV(r\*salt\*Treat) 10.35

**S28a: Analysis of Variance Table for Catalase (CAT) after 20 days (Cv Jinyou #1)**

| Source             | DF | SS     | MS     | F      | P      |
|--------------------|----|--------|--------|--------|--------|
| r                  | 2  | 571    | 285    |        |        |
| salt               | 1  | 326422 | 326422 | 256.16 | 0.0039 |
| Error r*salt       | 2  | 2549   | 1274   |        |        |
| Treat              | 3  | 4331   | 1444   | 1.17   | 0.3630 |
| salt*Treat         | 3  | 2040   | 680    | 0.55   | 0.6580 |
| Error r*salt*Treat | 12 | 14850  | 1237   |        |        |
| Total              | 23 | 350762 |        |        |        |

Grand Mean 451.12  
 CV(r\*salt) 7.91  
 CV(r\*salt\*Treat) 7.80

**S29a: Analysis of Variance Table for Catalase (CAT) after 30 days (Cv Jinyou #1)**

| Source             | DF | SS     | MS     | F       | P      |
|--------------------|----|--------|--------|---------|--------|
| r                  | 2  | 3748   | 1874   |         |        |
| salt               | 1  | 497815 | 497815 | 2473.86 | 0.0004 |
| Error r*salt       | 2  | 402    | 201    |         |        |
| Treat              | 3  | 5142   | 1714   | 2.39    | 0.1198 |
| salt*Treat         | 3  | 775    | 258    | 0.36    | 0.7830 |
| Error r*salt*Treat | 12 | 8607   | 717    |         |        |
| Total              | 23 | 516488 |        |         |        |

Grand Mean 472.99  
 CV(r\*salt) 3.00  
 CV(r\*salt\*Treat) 5.66

**S30: Analysis of Variance Table for Catalase (CAT) after 40 days (Cv Jinyou #1)**

| Source             | DF | SS     | MS     | F      | P      |
|--------------------|----|--------|--------|--------|--------|
| r                  | 2  | 754    | 377    |        |        |
| salt               | 1  | 671153 | 671153 | 319.74 | 0.0031 |
| Error r*salt       | 2  | 4198   | 2099   |        |        |
| Treat              | 3  | 11900  | 3967   | 3.73   | 0.0418 |
| salt*Treat         | 3  | 4810   | 1603   | 1.51   | 0.2623 |
| Error r*salt*Treat | 12 | 12747  | 1062   |        |        |
| Total              | 23 | 705562 |        |        |        |

Grand Mean 504.71  
 CV(r\*salt) 9.08  
 CV(r\*salt\*Treat) 6.46

**S31a: Analysis of Variance Table for Malondialdehyde (MDA) after 10 days (Cv jinyou #1)**

| Source | DF | SS      | MS      | F | P |
|--------|----|---------|---------|---|---|
| r      | 2  | 0.00533 | 0.00267 |   |   |



|                    |    |         |         |        |        |
|--------------------|----|---------|---------|--------|--------|
| salt               | 1  | 3.56282 | 3.56282 | 182.44 | 0.0054 |
| Error r*salt       | 2  | 0.03906 | 0.01953 |        |        |
| Treat              | 3  | 0.00872 | 0.00291 | 0.20   | 0.8945 |
| salt*Treat         | 3  | 0.10148 | 0.03383 | 2.32   | 0.1266 |
| Error r*salt*Treat | 12 | 0.17462 | 0.01455 |        |        |
| Total              | 23 | 3.89204 |         |        |        |

Grand Mean 1.4220

CV(r\*salt) 9.83

CV(r\*salt\*Treat) 8.48

**S32a: Analysis of Variance Table for Malondialdehyde (MDA) after 20 days (Cv Jinyou #1)**

| Source             | DF | SS      | MS      | F     | P      |
|--------------------|----|---------|---------|-------|--------|
| r                  | 2  | 0.2563  | 0.12817 |       |        |
| salt               | 1  | 9.0797  | 9.07966 | 32.81 | 0.0292 |
| Error r*salt       | 2  | 0.5535  | 0.27675 |       |        |
| Treat              | 3  | 0.2913  | 0.09711 | 1.04  | 0.4082 |
| salt*Treat         | 3  | 0.3389  | 0.11296 | 1.22  | 0.3464 |
| Error r*salt*Treat | 12 | 1.1154  | 0.09295 |       |        |
| Total              | 23 | 11.6351 |         |       |        |

Grand Mean 1.9394

CV(r\*salt) 27.13

CV(r\*salt\*Treat) 15.72

**S33a: Analysis of Variance Table for Malondialdehyde (MDA) after 30 days (Cv Jinyou #1)**

| Source             | DF | SS      | MS      | F      | P      |
|--------------------|----|---------|---------|--------|--------|
| r                  | 2  | 0.0639  | 0.0319  |        |        |
| salt               | 1  | 20.8425 | 20.8425 | 262.72 | 0.0038 |
| Error r*salt       | 2  | 0.1587  | 0.0793  |        |        |
| Treat              | 3  | 0.3188  | 0.1063  | 1.93   | 0.1788 |
| salt*Treat         | 3  | 0.1024  | 0.0341  | 0.62   | 0.6155 |
| Error r*salt*Treat | 12 | 0.6610  | 0.0551  |        |        |
| Total              | 23 | 22.1473 |         |        |        |

Grand Mean 2.4914

CV(r\*salt) 11.31

CV(r\*salt\*Treat) 9.42

**S34a: Analysis of Variance Table for Malondialdehyde (MDA) after 40 days (Cv Jinyou #1)**

| Source             | DF | SS      | MS      | F       | P      |
|--------------------|----|---------|---------|---------|--------|
| r                  | 2  | 0.1103  | 0.0551  |         |        |
| salt               | 1  | 34.0946 | 34.0946 | 1232.25 | 0.0008 |
| Error r*salt       | 2  | 0.0553  | 0.0277  |         |        |
| Treat              | 3  | 0.2410  | 0.0803  | 3.54    | 0.0482 |
| salt*Treat         | 3  | 0.0900  | 0.0300  | 1.32    | 0.3128 |
| Error r*salt*Treat | 12 | 0.2722  | 0.0227  |         |        |
| Total              | 23 | 34.8634 |         |         |        |

Grand Mean 2.8457

CV(r\*salt) 5.85

CV(r\*salt\*Treat) 5.29

**S35a: Analysis of Variance Table for AMF colonization percentage**

| Source      | DF | SS      | MS      | F      | P       |
|-------------|----|---------|---------|--------|---------|
| r           | 2  | 1.20    | 0.60    |        |         |
| s           | 1  | 2787.70 | 2787.70 | 663.82 | 0.0015  |
| Error r*s   | 2  | 8.40    | 4.20    |        |         |
| t           | 1  | 223.78  | 223.78  | 107.73 | 0.0005  |
| s*t         | 1  | 6.28    | 6.28    | 3.02   | 0.09571 |
| Error r*s*t | 4  | 8.31    | 2.08    |        |         |
| Total       | 11 | 3035.67 |         |        |         |

Grand Mean 66.060

CV(r\*s) 3.10

CV(r\*s\*t) 2.18

**S36a: Analysis of Variance Table for Nitrogen conc. in shoot (Cv Jinyou #1)**

| Source             | DF | SS      | MS      | F      | P      |
|--------------------|----|---------|---------|--------|--------|
| r                  | 2  | 32.09   | 16.04   |        |        |
| salt               | 1  | 1229.79 | 1229.79 | 606.01 | 0.0016 |
| Error r*salt       | 2  | 4.06    | 2.03    |        |        |
| Treat              | 3  | 269.48  | 89.83   | 7.83   | 0.0037 |
| salt*Treat         | 3  | 57.46   | 19.15   | 1.67   | 0.2260 |
| Error r*salt*Treat | 12 | 137.60  | 11.47   |        |        |
| Total              | 23 | 1730.48 |         |        |        |

Grand Mean 43.821

CV(r\*salt) 3.25

CV(r\*salt\*Treat) 7.73

**S37a: Analysis of Variance Table for Nitrogen conc. in root (Cv Jinyou #1)**

| Source             | DF | SS      | MS      | F    | P      |
|--------------------|----|---------|---------|------|--------|
| r                  | 2  | 119.079 | 59.539  |      |        |
| salt               | 1  | 200.967 | 200.967 | 4.94 | 0.1563 |
| Error r*salt       | 2  | 81.333  | 40.667  |      |        |
| Treat              | 3  | 110.905 | 36.968  | 1.20 | 0.3531 |
| salt*Treat         | 3  | 18.264  | 6.088   | 0.20 | 0.8965 |
| Error r*salt*Treat | 12 | 371.131 | 30.928  |      |        |
| Total              | 23 | 901.679 |         |      |        |

Grand Mean 17.350

CV(r\*salt) 36.75

CV(r\*salt\*Treat) 32.05

**S38a: Analysis of Variance Table for phosphorus conc. in shoot (Cv Jinyou #1)**

| Source             | DF | SS      | MS      | F       | P      |
|--------------------|----|---------|---------|---------|--------|
| r                  | 2  | 5.75    | 2.87    |         |        |
| salt               | 1  | 1059.03 | 1059.03 | 2038.63 | 0.0005 |
| Error r*salt       | 2  | 1.04    | 0.52    |         |        |
| Treat              | 3  | 105.82  | 35.27   | 7.57    | 0.0042 |
| salt*Treat         | 3  | 14.08   | 4.69    | 1.01    | 0.4231 |
| Error r*salt*Treat | 12 | 55.88   | 4.66    |         |        |
| Total              | 23 | 1241.59 |         |         |        |

Grand Mean 39.027  
 CV(r\*salt) 1.85  
 CV(r\*salt\*Treat) 5.53

**S39a: Analysis of Variance Table for phosphorus conc. in root (Cv Jinyou #1)**

| Source             | DF | SS      | MS      | F      | P      |
|--------------------|----|---------|---------|--------|--------|
| r                  | 2  | 14.32   | 7.16    |        |        |
| salt               | 1  | 2297.42 | 2297.42 | 169.47 | 0.0058 |
| Error r*salt       | 2  | 27.11   | 13.56   |        |        |
| Treat              | 3  | 733.36  | 244.45  | 23.50  | 0.0000 |
| salt*Treat         | 3  | 86.40   | 28.80   | 2.77   | 0.0875 |
| Error r*salt*Treat | 12 | 124.81  | 10.40   |        |        |
| Total              | 23 | 3283.42 |         |        |        |

Grand Mean 98.836  
 CV(r\*salt) 3.73  
 CV(r\*salt\*Treat) 3.26

**S40a: Analysis of Variance Table for potassium conc. in shoot (Cv Jinyou #1)**

| Source             | DF | SS      | MS      | F      | P      |
|--------------------|----|---------|---------|--------|--------|
| r                  | 2  | 7.61    | 3.81    |        |        |
| salt               | 1  | 4892.92 | 4892.92 | 299.01 | 0.0033 |
| Error r*salt       | 2  | 32.73   | 16.36   |        |        |
| Treat              | 3  | 570.01  | 190.00  | 42.39  | 0.0000 |
| salt*Treat         | 3  | 57.65   | 19.22   | 4.29   | 0.0284 |
| Error r*salt*Treat | 12 | 53.78   | 4.48    |        |        |
| Total              | 23 | 5614.70 |         |        |        |

Grand Mean 73.857  
 CV(r\*salt) 5.48  
 CV(r\*salt\*Treat) 2.87

**S41a: Analysis of Variance Table for potassium conc. in root (Cv Jinyou #1)**

| Source             | DF | SS      | MS      | F      | P      |
|--------------------|----|---------|---------|--------|--------|
| r                  | 2  | 10.08   | 5.04    |        |        |
| salt               | 1  | 4436.47 | 4436.47 | 908.41 | 0.0011 |
| Error r*salt       | 2  | 9.77    | 4.88    |        |        |
| Treat              | 3  | 268.52  | 89.51   | 16.13  | 0.0002 |
| salt*Treat         | 3  | 1833.72 | 611.24  | 110.15 | 0.0000 |
| Error r*salt*Treat | 12 | 66.59   | 5.55    |        |        |
| Total              | 23 | 6625.15 |         |        |        |

Grand Mean 107.89  
 CV(r\*salt) 2.05  
 CV(r\*salt\*Treat) 2.18

**S42a: Analysis of Variance Table for sodium conc.in shoot (Cv Jinyou #1)**

| Source             | DF | SS      | MS      | F       | P      |
|--------------------|----|---------|---------|---------|--------|
| r                  | 2  | 4.5     | 2.2     |         |        |
| salt               | 1  | 41247.0 | 41247.0 | 2666.16 | 0.0004 |
| Error r*salt       | 2  | 30.9    | 15.5    |         |        |
| Treat              | 3  | 6006.3  | 2002.1  | 529.96  | 0.0000 |
| salt*Treat         | 3  | 5008.4  | 1669.5  | 441.91  | 0.0000 |
| Error r*salt*Treat | 12 | 45.3    | 3.8     |         |        |
| Total              | 23 | 52342.4 |         |         |        |

Grand Mean 62.977  
 CV(r\*salt) 6.25  
 CV(r\*salt\*Treat) 3.09

**S43a: Analysis of Variance Table for sodium conc. in root (Cv Jinyou #1)**

| Source             | DF | SS      | MS      | F       | P      |
|--------------------|----|---------|---------|---------|--------|
| r                  | 2  | 23.2    | 11.6    |         |        |
| salt               | 1  | 58443.2 | 58443.2 | 12007.4 | 0.0001 |
| Error r*salt       | 2  | 9.7     | 4.9     |         |        |
| Treat              | 3  | 2568.0  | 856.0   | 34.05   | 0.0000 |
| salt*Treat         | 3  | 1202.3  | 400.8   | 15.94   | 0.0002 |
| Error r*salt*Treat | 12 | 301.7   | 25.1    |         |        |
| Total              | 23 | 62548.0 |         |         |        |

Grand Mean 74.043  
 CV(r\*salt) 2.98  
 CV(r\*salt\*Treat) 6.77

**S44a: Analysis of Variance Table for K/Na ratio in shoot (Cv Jinyou #1)**

| Source             | DF | SS      | MS      | F      | P      |
|--------------------|----|---------|---------|--------|--------|
| r                  | 2  | 0.2989  | 0.1494  |        |        |
| salt               | 1  | 75.5664 | 75.5664 | 500.53 | 0.0020 |
| Error r*salt       | 2  | 0.3019  | 0.1510  |        |        |
| Treat              | 3  | 2.8885  | 0.9628  | 29.81  | 0.0000 |
| salt*Treat         | 3  | 0.8471  | 0.2824  | 8.74   | 0.0024 |
| Error r*salt*Treat | 12 | 0.3876  | 0.0323  |        |        |
| Total              | 23 | 80.2903 |         |        |        |

Grand Mean 2.3968  
 CV(r\*salt) 16.21  
 CV(r\*salt\*Treat) 7.50

**S45a: Analysis of Variance Table for K/Na ratio in root (Cv jinyou #1)**

| Source             | DF | SS      | MS      | F      | P      |
|--------------------|----|---------|---------|--------|--------|
| r                  | 2  | 0.4103  | 0.2052  |        |        |
| salt               | 1  | 54.0997 | 54.0997 | 313.69 | 0.0032 |
| Error r*salt       | 2  | 0.3449  | 0.1725  |        |        |
| Treat              | 3  | 4.0262  | 1.3421  | 4.69   | 0.0217 |
| salt*Treat         | 3  | 3.3454  | 1.1151  | 3.90   | 0.0372 |
| Error r*salt*Treat | 12 | 3.4350  | 0.2863  |        |        |
| Total              | 23 | 65.6615 |         |        |        |

Grand Mean 2.4931  
 CV(r\*salt) 16.66  
 CV(r\*salt\*Treat) 21.46

**S1b: Analysis of Variance Table for Plant length (Cv CCMC)**

| Source             | DF | SS      | MS      | F      | P      |
|--------------------|----|---------|---------|--------|--------|
| r                  | 2  | 39.73   | 19.87   |        |        |
| salt               | 1  | 1218.37 | 1218.37 | 171.00 | 0.0058 |
| Error r*salt       | 2  | 14.25   | 7.12    |        |        |
| Treat              | 3  | 328.20  | 109.40  | 5.60   | 0.0123 |
| salt*Treat         | 3  | 52.01   | 17.34   | 0.89   | 0.4755 |
| Error r*salt*Treat | 12 | 234.54  | 19.54   |        |        |
| Total              | 23 | 1887.10 |         |        |        |

Grand Mean 80.959  
 CV(r\*salt) 3.30  
 CV(r\*salt\*Treat) 5.46

**S2b: Analysis of Variance Table for Root length (Cv CCMC)**

| Source             | DF | SS      | MS      | F     | P      |
|--------------------|----|---------|---------|-------|--------|
| r                  | 2  | 72.63   | 36.31   |       |        |
| salt               | 1  | 1117.25 | 1117.25 | 58.32 | 0.0167 |
| Error r*salt       | 2  | 38.32   | 19.16   |       |        |
| Treat              | 3  | 134.96  | 44.99   | 1.24  | 0.3374 |
| salt*Treat         | 3  | 13.88   | 4.63    | 0.13  | 0.9418 |
| Error r*salt*Treat | 12 | 434.41  | 36.20   |       |        |
| Total              | 23 | 1811.45 |         |       |        |

Grand Mean 44.065  
 CV(r\*salt) 9.93  
 CV(r\*salt\*Treat) 13.65

**S3b: Analysis of Variance Table for Shoot fresh weight (Cv CCMC)**

| Source             | DF | SS      | MS      | F      | P      |
|--------------------|----|---------|---------|--------|--------|
| r                  | 2  | 191.90  | 95.95   |        |        |
| salt               | 1  | 5089.89 | 5089.89 | 563.02 | 0.0018 |
| Error r*salt       | 2  | 18.08   | 9.04    |        |        |
| Treat              | 3  | 743.54  | 247.85  | 24.16  | 0.0000 |
| salt*Treat         | 3  | 251.31  | 83.77   | 8.17   | 0.0031 |
| Error r*salt*Treat | 12 | 123.08  | 10.26   |        |        |
| Total              | 23 | 6417.80 |         |        |        |

Grand Mean 90.268  
 CV(r\*salt) 3.33  
 CV(r\*salt\*Treat) 3.55

**S4b: Analysis of Variance Table for Shoot dry weight (Cv CCMC)**

| Source             | DF | SS      | MS      | F     | P      |
|--------------------|----|---------|---------|-------|--------|
| r                  | 2  | 12.225  | 6.113   |       |        |
| salt               | 1  | 311.905 | 311.905 | 38.92 | 0.0247 |
| Error r*salt       | 2  | 16.027  | 8.013   |       |        |
| Treat              | 3  | 71.506  | 23.835  | 2.73  | 0.0901 |
| salt*Treat         | 3  | 12.655  | 4.218   | 0.48  | 0.6999 |
| Error r*salt*Treat | 12 | 104.683 | 8.724   |       |        |
| Total              | 23 | 529.001 |         |       |        |

Grand Mean 15.183  
 CV(r\*salt) 18.64  
 CV(r\*salt\*Treat) 19.45

**S5b: Analysis of Variance Table for Root fresh weight (Cv CCMC)**

| Source             | DF | SS      | MS      | F     | P      |
|--------------------|----|---------|---------|-------|--------|
| r                  | 2  | 1.035   | 0.518   |       |        |
| salt               | 1  | 255.323 | 255.323 | 57.31 | 0.0170 |
| Error r*salt       | 2  | 8.910   | 4.455   |       |        |
| Treat              | 3  | 62.415  | 20.805  | 1.53  | 0.2584 |
| salt*Treat         | 3  | 2.819   | 0.940   | 0.07  | 0.9754 |
| Error r*salt*Treat | 12 | 163.674 | 13.639  |       |        |

Total 23 494.176

Grand Mean 16.637

CV(r\*salt) 12.69

CV(r\*salt\*Treat) 22.20

**S6b: Analysis of Variance Table for Root dry weight (Cv CCMC)**

| Source             | DF | SS      | MS      | F       | P      |
|--------------------|----|---------|---------|---------|--------|
| r                  | 2  | 0.3039  | 0.1519  |         |        |
| salt               | 1  | 28.1233 | 28.1233 | 2995.83 | 0.0003 |
| Error r*salt       | 2  | 0.0188  | 0.0094  |         |        |
| Treat              | 3  | 4.6224  | 1.5408  | 13.17   | 0.0004 |
| salt*Treat         | 3  | 1.0256  | 0.3419  | 2.92    | 0.0774 |
| Error r*salt*Treat | 12 | 1.4037  | 0.1170  |         |        |
| Total              | 23 | 35.4978 |         |         |        |

Grand Mean 3.0208

CV(r\*salt) 3.21

CV(r\*salt\*Treat) 11.32

**S7b: Analysis of Variance Table for chlorophyll a (Cv CCMC)**

| Source             | DF | SS      | MS      | F      | P      |
|--------------------|----|---------|---------|--------|--------|
| r                  | 2  | 0.1986  | 0.0993  |        |        |
| salt               | 1  | 57.8283 | 57.8283 | 987.07 | 0.0010 |
| Error r*salt       | 2  | 0.1172  | 0.0586  |        |        |
| Treat              | 3  | 8.4940  | 2.8313  | 22.15  | 0.0000 |
| salt*Treat         | 3  | 6.9749  | 2.3250  | 18.19  | 0.0001 |
| Error r*salt*Treat | 12 | 1.5337  | 0.1278  |        |        |
| Total              | 23 | 75.1467 |         |        |        |

Grand Mean 15.902

CV(r\*salt) 1.52

CV(r\*salt\*Treat) 2.25

**S8b: Analysis of Variance Table for chlorophyll b (Cv CCMC)**

| Source             | DF | SS      | MS      | F     | P      |
|--------------------|----|---------|---------|-------|--------|
| r                  | 2  | 1.0343  | 0.5172  |       |        |
| salt               | 1  | 11.0820 | 11.0820 | 47.36 | 0.0205 |
| Error r*salt       | 2  | 0.4680  | 0.2340  |       |        |
| Treat              | 3  | 4.2499  | 1.4166  | 2.75  | 0.0889 |
| salt*Treat         | 3  | 1.1247  | 0.3749  | 0.73  | 0.5549 |
| Error r*salt*Treat | 12 | 6.1829  | 0.5152  |       |        |
| Total              | 23 | 24.1419 |         |       |        |

Grand Mean 4.6205

CV(r\*salt) 10.47

CV(r\*salt\*Treat) 15.54

**S9b: Analysis of Variance Table for total chlorophyll (Cv CCMC)**

| Source             | DF | SS      | MS      | F      | P      |
|--------------------|----|---------|---------|--------|--------|
| r                  | 2  | 0.401   | 0.200   |        |        |
| salt               | 1  | 119.540 | 119.540 | 240.93 | 0.0041 |
| Error r*salt       | 2  | 0.992   | 0.496   |        |        |
| Treat              | 3  | 24.358  | 8.119   | 14.02  | 0.0003 |
| salt*Treat         | 3  | 13.616  | 4.539   | 7.84   | 0.0037 |
| Error r*salt*Treat | 12 | 6.950   | 0.579   |        |        |

Total 23 165.857

Grand Mean 20.523

CV(r\*salt) 3.43

CV(r\*salt\*Treat) 3.71

**S10b: Analysis of Variance Table for Root activity (Cv CCMC)**

| Source             | DF | SS      | MS      | F      | P      |
|--------------------|----|---------|---------|--------|--------|
| r                  | 2  | 15.507  | 7.753   |        |        |
| salt               | 1  | 459.231 | 459.231 | 218.77 | 0.0045 |
| Error r*salt       | 2  | 4.198   | 2.099   |        |        |
| Treat              | 3  | 89.757  | 29.919  | 10.50  | 0.0011 |
| salt*Treat         | 3  | 28.640  | 9.547   | 3.35   | 0.0556 |
| Error r*salt*Treat | 12 | 34.207  | 2.851   |        |        |
| Total              | 23 | 631.539 |         |        |        |

Grand Mean 22.284

CV(r\*salt) 6.50

CV(r\*salt\*Treat) 7.58

**S11b: Analysis of Variance Table for Electrolyte leakage after 20 days (Cv CCMC)**

| Source             | DF | SS      | MS      | F       | P      |
|--------------------|----|---------|---------|---------|--------|
| r                  | 2  | 2.27    | 1.137   |         |        |
| salt               | 1  | 896.83  | 896.826 | 5854.75 | 0.0002 |
| Error r*salt       | 2  | 0.31    | 0.153   |         |        |
| Treat              | 3  | 54.53   | 18.176  | 10.41   | 0.0012 |
| salt*Treat         | 3  | 73.54   | 24.513  | 14.03   | 0.0003 |
| Error r*salt*Treat | 12 | 20.96   | 1.747   |         |        |
| Total              | 23 | 1048.43 |         |         |        |

Grand Mean 19.985

CV(r\*salt) 1.96

CV(r\*salt\*Treat) 6.61

**S12b: Analysis of Variance Table for Electrolyte leakage after 40 days (Cv CCMC)**

| Source             | DF | SS      | MS      | F      | P      |
|--------------------|----|---------|---------|--------|--------|
| r                  | 2  | 0.279   | 0.140   |        |        |
| salt               | 1  | 677.450 | 677.450 | 114.81 | 0.0086 |
| Error r*salt       | 2  | 11.801  | 5.900   |        |        |
| Treat              | 3  | 82.624  | 27.541  | 23.30  | 0.0000 |
| salt*Treat         | 3  | 35.337  | 11.779  | 9.96   | 0.0014 |
| Error r*salt*Treat | 12 | 14.185  | 1.182   |        |        |
| Total              | 23 | 821.676 |         |        |        |

Grand Mean 12.102

CV(r\*salt) 20.07

CV(r\*salt\*Treat) 8.98

**S13b: Analysis of Variance Table for Leaf relative water content after 20 days (Cv CCMC)**

| Source       | DF | SS      | MS      | F     | P      |
|--------------|----|---------|---------|-------|--------|
| r            | 2  | 3.75    | 1.87    |       |        |
| salt         | 1  | 1717.01 | 1717.01 | 40.51 | 0.0238 |
| Error r*salt | 2  | 84.76   | 42.38   |       |        |

|                    |    |         |        |       |        |
|--------------------|----|---------|--------|-------|--------|
| Treat              | 3  | 503.26  | 167.75 | 13.98 | 0.0003 |
| salt*Treat         | 3  | 159.64  | 53.21  | 4.43  | 0.0257 |
| Error r*salt*Treat | 12 | 144.00  | 12.00  |       |        |
| Total              | 23 | 2612.42 |        |       |        |

Grand Mean 74.512  
 CV(r\*salt) 8.74  
 CV(r\*salt\*Treat) 4.65

**S14b: Analysis of Variance Table for Leaf relative water content after 40 days (Cv CCMC)**

| Source             | DF | SS      | MS      | F       | P      |
|--------------------|----|---------|---------|---------|--------|
| r                  | 2  | 5.22    | 2.61    |         |        |
| salt               | 1  | 3155.81 | 3155.81 | 4392.73 | 0.0002 |
| Error r*salt       | 2  | 1.44    | 0.72    |         |        |
| Treat              | 3  | 269.72  | 89.91   | 14.43   | 0.0003 |
| salt*Treat         | 3  | 87.35   | 29.12   | 4.67    | 0.0219 |
| Error r*salt*Treat | 12 | 74.79   | 6.23    |         |        |
| Total              | 23 | 3594.33 |         |         |        |

Grand Mean 53.524  
 CV(r\*salt) 1.58  
 CV(r\*salt\*Treat) 4.66

**S15b: Analysis of Variance Table for photosynthesis (Cv CCMC)**

| Source             | DF | SS      | MS      | F     | P      |
|--------------------|----|---------|---------|-------|--------|
| r                  | 2  | 1.2800  | 0.6400  |       |        |
| salt               | 1  | 31.6251 | 31.6251 | 82.54 | 0.0119 |
| Error r*salt       | 2  | 0.7663  | 0.3832  |       |        |
| Treat              | 3  | 5.2515  | 1.7505  | 6.52  | 0.0073 |
| salt*Treat         | 3  | 2.5041  | 0.8347  | 3.11  | 0.0667 |
| Error r*salt*Treat | 12 | 3.2197  | 0.2683  |       |        |
| Total              | 23 | 44.6469 |         |       |        |

Grand Mean 7.5587  
 CV(r\*salt) 8.19  
 CV(r\*salt\*Treat) 6.85

**S16b: Analysis of Variance Table for stomatal conductance (Cv CCMC)**

| Source             | DF | SS      | MS      | F     | P      |
|--------------------|----|---------|---------|-------|--------|
| r                  | 2  | 0.00119 | 0.00060 |       |        |
| salt               | 1  | 0.04646 | 0.04646 | 48.55 | 0.0200 |
| Error r*salt       | 2  | 0.00191 | 0.00096 |       |        |
| Treat              | 3  | 0.00177 | 0.00059 | 1.28  | 0.3255 |
| salt*Treat         | 3  | 0.00282 | 0.00094 | 2.04  | 0.1615 |
| Error r*salt*Treat | 12 | 0.00553 | 0.00046 |       |        |



Total 23 0.05969

Grand Mean 0.2068

CV(r\*salt) 14.96

CV(r\*salt\*Treat) 10.38

**S17b: Analysis of Variance Table for intercellular Carbon dioxide conc. (Cv CCMC)**

| Source             | DF | SS      | MS      | F      | P      |
|--------------------|----|---------|---------|--------|--------|
| r                  | 2  | 13.08   | 6.54    |        |        |
| salt               | 1  | 4999.71 | 4999.71 | 731.98 | 0.0014 |
| Error r*salt       | 2  | 13.66   | 6.83    |        |        |
| Treat              | 3  | 1159.11 | 386.37  | 40.31  | 0.0000 |
| salt*Treat         | 3  | 171.42  | 57.14   | 5.96   | 0.0100 |
| Error r*salt*Treat | 12 | 115.02  | 9.59    |        |        |
| Total              | 23 | 6472.00 |         |        |        |

Grand Mean 381.10

CV(r\*salt) 0.69

CV(r\*salt\*Treat) 1.81

**S18b: Analysis of Variance Table for transpiration rate (Cv CCMC)**

| Source             | DF | SS      | MS      | F       | P      |
|--------------------|----|---------|---------|---------|--------|
| r                  | 2  | 0.0006  | 0.0003  |         |        |
| salt               | 1  | 10.2133 | 10.2133 | 9014.75 | 0.0001 |
| Error r*salt       | 2  | 0.0023  | 0.0011  |         |        |
| Treat              | 3  | 0.4203  | 0.1401  | 83.93   | 0.0000 |
| salt*Treat         | 3  | 0.1171  | 0.0390  | 23.38   | 0.0000 |
| Error r*salt*Treat | 12 | 0.0200  | 0.0017  |         |        |
| Total              | 23 | 10.7736 |         |         |        |

Grand Mean 1.4318

CV(r\*salt) 2.35

CV(r\*salt\*Treat) 2.85

**S19b: Analysis of Variance Table for Superoxide dismutase (SOD) after 10 days (Cv CCMC)**

| Source             | DF | SS     | MS     | F      | P      |
|--------------------|----|--------|--------|--------|--------|
| r                  | 2  | 4461   | 2231   |        |        |
| salt               | 1  | 166236 | 166236 | 912.38 | 0.0011 |
| Error r*salt       | 2  | 364    | 182    |        |        |
| Treat              | 3  | 3078   | 1026   | 1.02   | 0.4198 |
| salt*Treat         | 3  | 3409   | 1136   | 1.12   | 0.3778 |
| Error r*salt*Treat | 12 | 12122  | 1010   |        |        |
| Total              | 23 | 189670 |        |        |        |

Grand Mean 432.81

CV(r\*salt) 3.12

CV(r\*salt\*Treat) 7.34

**S20b: Analysis of Variance Table for Superoxide dismutase (SOD) after 20 days (CV CCMC)**

| Source       | DF | SS     | MS     | F       | P      |
|--------------|----|--------|--------|---------|--------|
| r            | 2  | 5824   | 2912   |         |        |
| salt         | 1  | 407003 | 407003 | 2472.76 | 0.0004 |
| Error r*salt | 2  | 329    | 165    |         |        |

|                    |    |        |      |      |        |
|--------------------|----|--------|------|------|--------|
| Treat              | 3  | 5180   | 1727 | 2.16 | 0.1462 |
| salt*Treat         | 3  | 4063   | 1354 | 1.69 | 0.2216 |
| Error r*salt*Treat | 12 | 9606   | 801  |      |        |
| Total              | 23 | 432006 |      |      |        |

Grand Mean 490.44  
CV(r\*salt) 2.62  
CV(r\*salt\*Treat) 5.77

**S21b: Analysis of Variance Table for Superoxide dismutase (SOD) after 30 days (Cv CCMC)**

| Source             | DF | SS     | MS     | F      | P      |
|--------------------|----|--------|--------|--------|--------|
| r                  | 2  | 4148   | 2074   |        |        |
| salt               | 1  | 366930 | 366930 | 776.51 | 0.0013 |
| Error r*salt       | 2  | 945    | 473    |        |        |
| Treat              | 3  | 7237   | 2412   | 9.62   | 0.0016 |
| salt*Treat         | 3  | 8502   | 2834   | 11.30  | 0.0008 |
| Error r*salt*Treat | 12 | 3009   | 251    |        |        |
| Total              | 23 | 390772 |        |        |        |

Grand Mean 497.06  
CV(r\*salt) 4.37  
CV(r\*salt\*Treat) 3.19

**S22b: Analysis of Variance Table for Superoxide dismutase (SOD) after 40 days (Cv CCMC)**

| Source             | DF | SS     | MS     | F      | P      |
|--------------------|----|--------|--------|--------|--------|
| r                  | 2  | 1416   | 708    |        |        |
| salt               | 1  | 160586 | 160586 | 116.09 | 0.0085 |
| Error r*salt       | 2  | 2767   | 1383   |        |        |
| Treat              | 3  | 9920   | 3307   | 12.36  | 0.0006 |
| salt*Treat         | 3  | 1246   | 415    | 1.55   | 0.2521 |
| Error r*salt*Treat | 12 | 3211   | 268    |        |        |
| Total              | 23 | 179145 |        |        |        |

Grand Mean 488.54  
CV(r\*salt) 7.61  
CV(r\*salt\*Treat) 3.35

**S23b: Analysis of Variance Table for Peroxidase (POD) after 10 days (Cv CCMC)**

| Source             | DF | SS      | MS      | F      | P      |
|--------------------|----|---------|---------|--------|--------|
| r                  | 2  | 7135    | 3568    |        |        |
| salt               | 1  | 1030999 | 1030999 | 448.86 | 0.0022 |
| Error r*salt       | 2  | 4594    | 2297    |        |        |
| Treat              | 3  | 10627   | 3542    | 2.59   | 0.1014 |
| salt*Treat         | 3  | 5199    | 1733    | 1.27   | 0.3299 |
| Error r*salt*Treat | 12 | 16420   | 1368    |        |        |
| Total              | 23 | 1074975 |         |        |        |

Grand Mean 1000.2  
CV(r\*salt) 4.79  
CV(r\*salt\*Treat) 3.70

**S24b: Analysis of Variance Table for Peroxidase (POD) after 20 days (Cv CCMC)**

| Source             | DF | SS     | MS     | F       | P      |
|--------------------|----|--------|--------|---------|--------|
| r                  | 2  | 2776   | 1388   |         |        |
| salt               | 1  | 923067 | 923067 | 4062.58 | 0.0002 |
| Error r*salt       | 2  | 454    | 227    |         |        |
| Treat              | 3  | 8129   | 2710   | 2.26    | 0.1343 |
| salt*Treat         | 3  | 6580   | 2193   | 1.83    | 0.1961 |
| Error r*salt*Treat | 12 | 14416  | 1201   |         |        |
| Total              | 23 | 955422 |        |         |        |

Grand Mean 1029.6

CV(r\*salt) 1.46

CV(r\*salt\*Treat) 3.37

**S25b: Analysis of Variance Table for Peroxidase (POD) after 30 days (Cv CCMC)**

| Source             | DF | SS      | MS      | F       | P      |
|--------------------|----|---------|---------|---------|--------|
| r                  | 2  | 1558    | 779     |         |        |
| salt               | 1  | 1008143 | 1008143 | 1632.13 | 0.0006 |
| Error r*salt       | 2  | 1235    | 618     |         |        |
| Treat              | 3  | 6056    | 2019    | 1.88    | 0.1863 |
| salt*Treat         | 3  | 2305    | 768     | 0.72    | 0.5607 |
| Error r*salt*Treat | 12 | 12865   | 1072    |         |        |
| Total              | 23 | 1032163 |         |         |        |

Grand Mean 1042.5

CV(r\*salt) 2.38

CV(r\*salt\*Treat) 3.14

**S26b: Analysis of Variance Table for Peroxidase (POD) after 40 days (Cv CCMC)**

| Source             | DF | SS     | MS     | F      | P      |
|--------------------|----|--------|--------|--------|--------|
| r                  | 2  | 38     | 19     |        |        |
| salt               | 1  | 857529 | 857529 | 357.65 | 0.0028 |
| Error r*salt       | 2  | 4795   | 2398   |        |        |
| Treat              | 3  | 15973  | 5324   | 8.38   | 0.0028 |
| salt*Treat         | 3  | 8096   | 2699   | 4.25   | 0.0291 |
| Error r*salt*Treat | 12 | 7623   | 635    |        |        |
| Total              | 23 | 894055 |        |        |        |

Grand Mean 1044.1

CV(r\*salt) 4.69

CV(r\*salt\*Treat) 2.41

**S27b: Analysis of Variance Table for Catalase (CAT) after 10 days (Cv CCMC)**

| Source             | DF | SS     | MS     | F      | P      |
|--------------------|----|--------|--------|--------|--------|
| r                  | 2  | 1236   | 618    |        |        |
| salt               | 1  | 122132 | 122132 | 203.38 | 0.0049 |
| Error r*salt       | 2  | 1201   | 601    |        |        |
| Treat              | 3  | 5412   | 1804   | 0.62   | 0.6177 |
| salt*Treat         | 3  | 400    | 133    | 0.05   | 0.9865 |
| Error r*salt*Treat | 12 | 35146  | 2929   |        |        |
| Total              | 23 | 165527 |        |        |        |

Grand Mean 418.79

CV(r\*salt) 5.85

CV(r\*salt\*Treat) 12.92

**S28b: Analysis of Variance Table for Catalase (CAT) after 20 days (Cv CCMC)**

| Source             | DF | SS     | MS     | F       | P      |
|--------------------|----|--------|--------|---------|--------|
| r                  | 2  | 1481   | 740    |         |        |
| salt               | 1  | 301502 | 301502 | 6214.05 | 0.0002 |
| Error r*salt       | 2  | 97     | 49     |         |        |
| Treat              | 3  | 3391   | 1130   | 1.03    | 0.4130 |
| salt*Treat         | 3  | 3392   | 1131   | 1.03    | 0.4129 |
| Error r*salt*Treat | 12 | 13137  | 1095   |         |        |
| Total              | 23 | 323000 |        |         |        |

Grand Mean 473.75

CV(r\*salt) 1.47

CV(r\*salt\*Treat) 6.98

**S29b: Analysis of Variance Table for Catalase (CAT) after 30 days (Cv CCMC)**

| Source             | DF | SS     | MS     | F      | P      |
|--------------------|----|--------|--------|--------|--------|
| r                  | 2  | 2550   | 1275   |        |        |
| salt               | 1  | 529672 | 529672 | 856126 | 0.0000 |
| Error r*salt       | 2  | 1      | 1      |        |        |
| Treat              | 3  | 15528  | 5176   | 6.39   | 0.0078 |
| salt*Treat         | 3  | 3198   | 1066   | 1.32   | 0.3149 |
| Error r*salt*Treat | 12 | 9724   | 810    |        |        |
| Total              | 23 | 560673 |        |        |        |

Grand Mean 518.45

CV(r\*salt) 0.15

CV(r\*salt\*Treat) 5.49

**S30b: Analysis of Variance Table for Catalase (CAT) after 40 days (Cv CCMC)**

| Source             | DF | SS     | MS     | F      | P      |
|--------------------|----|--------|--------|--------|--------|
| r                  | 2  | 2418   | 1209   |        |        |
| salt               | 1  | 807135 | 807135 | 337.18 | 0.0030 |
| Error r*salt       | 2  | 4788   | 2394   |        |        |
| Treat              | 3  | 13235  | 4412   | 8.21   | 0.0031 |
| salt*Treat         | 3  | 2367   | 789    | 1.47   | 0.2727 |
| Error r*salt*Treat | 12 | 6450   | 537    |        |        |
| Total              | 23 | 836393 |        |        |        |

Grand Mean 558.85

CV(r\*salt) 8.75

CV(r\*salt\*Treat) 4.15

**S31b: Analysis of Variance Table for Malondialdehyde (MDA) after 10 days (Cv CCMC)**

| Source             | DF | SS      | MS      | F       | P      |
|--------------------|----|---------|---------|---------|--------|
| r                  | 2  | 0.00079 | 0.00039 |         |        |
| salt               | 1  | 1.77858 | 1.77858 | 6221.53 | 0.0002 |
| Error r*salt       | 2  | 0.00057 | 0.00029 |         |        |
| Treat              | 3  | 0.02119 | 0.00706 | 1.39    | 0.2920 |
| salt*Treat         | 3  | 0.02145 | 0.00715 | 1.41    | 0.2874 |
| Error r*salt*Treat | 12 | 0.06077 | 0.00506 |         |        |
| Total              | 23 | 1.88336 |         |         |        |

Grand Mean 1.3892  
 CV(r\*salt) 1.22  
 CV(r\*salt\*Treat) 5.12

**S32b: Analysis of Variance Table for Malondialdehyde (MDA) after 20 days (Cv CCMC)**

| Source             | DF | SS      | MS      | F      | P      |
|--------------------|----|---------|---------|--------|--------|
| r                  | 2  | 0.03334 | 0.01667 |        |        |
| salt               | 1  | 8.97962 | 8.97962 | 366.27 | 0.0027 |
| Error r*salt       | 2  | 0.04903 | 0.02452 |        |        |
| Treat              | 3  | 0.16710 | 0.05570 | 2.16   | 0.1455 |
| salt*Treat         | 3  | 0.17362 | 0.05787 | 2.25   | 0.1353 |
| Error r*salt*Treat | 12 | 0.30909 | 0.02576 |        |        |
| Total              | 23 | 9.71180 |         |        |        |

Grand Mean 2.0506  
 CV(r\*salt) 7.64  
 CV(r\*salt\*Treat) 7.83

**S33b: Analysis of Variance Table for Malondialdehyde (MDA) after 30 days (Cv CCMC)**

| Source             | DF | SS      | MS      | F      | P      |
|--------------------|----|---------|---------|--------|--------|
| r                  | 2  | 0.0908  | 0.0454  |        |        |
| salt               | 1  | 15.9753 | 15.9753 | 456.66 | 0.0022 |
| Error r*salt       | 2  | 0.0700  | 0.0350  |        |        |
| Treat              | 3  | 0.2734  | 0.0911  | 3.32   | 0.0568 |
| salt*Treat         | 3  | 0.1734  | 0.0578  | 2.11   | 0.1529 |
| Error r*salt*Treat | 12 | 0.3294  | 0.0275  |        |        |
| Total              | 23 | 16.9123 |         |        |        |

Grand Mean 2.4549  
 CV(r\*salt) 7.62  
 CV(r\*salt\*Treat) 6.75

**S34b: Analysis of Variance Table for Malondialdehyde (MDA) after 40 days (Cv CCMC)**

| Source             | DF | SS      | MS      | F       | P      |
|--------------------|----|---------|---------|---------|--------|
| r                  | 2  | 0.0819  | 0.0409  |         |        |
| salt               | 1  | 27.3330 | 27.3330 | 2744.41 | 0.0004 |
| Error r*salt       | 2  | 0.0199  | 0.0100  |         |        |
| Treat              | 3  | 0.1617  | 0.0539  | 1.36    | 0.3019 |
| salt*Treat         | 3  | 0.0854  | 0.0285  | 0.72    | 0.5598 |
| Error r*salt*Treat | 12 | 0.4755  | 0.0396  |         |        |
| Total              | 23 | 28.1575 |         |         |        |

Grand Mean 2.8573  
 CV(r\*salt) 3.49  
 CV(r\*salt\*Treat) 6.97

**S35b: Analysis of Variance Table for AMF colonization percentage**

| Source    | DF | SS      | MS      | F      | P      |
|-----------|----|---------|---------|--------|--------|
| r         | 2  | 7.94    | 3.97    |        |        |
| s         | 1  | 1330.99 | 1330.99 | 167.84 | 0.0059 |
| Error r*s | 2  | 15.86   | 7.93    |        |        |
| t         | 1  | 76.00   | 76.00   | 41.11  | 0.0030 |

|             |    |         |      |      |        |
|-------------|----|---------|------|------|--------|
| s*t         | 1  | 0.51    | 0.51 | 0.28 | 0.2264 |
| Error r*s*t | 4  | 7.40    | 1.85 |      |        |
| Total       | 11 | 1438.71 |      |      |        |

Grand Mean 65.565  
 CV(r\*s) 4.30  
 CV(r\*s\*t) 2.07

**S36b: Analysis of Variance Table for Nitrogen conc. in shoot (Cv CCMC)**

| Source             | DF | SS      | MS      | F     | P      |
|--------------------|----|---------|---------|-------|--------|
| r                  | 2  | 0.37    | 0.184   |       |        |
| salt               | 1  | 521.64  | 521.644 | 24.84 | 0.0380 |
| Error r*salt       | 2  | 42.00   | 21.001  |       |        |
| Treat              | 3  | 298.34  | 99.446  | 5.09  | 0.0167 |
| salt*Treat         | 3  | 36.13   | 12.043  | 0.62  | 0.6172 |
| Error r*salt*Treat | 12 | 234.24  | 19.520  |       |        |
| Total              | 23 | 1132.72 |         |       |        |

Grand Mean 42.694  
 CV(r\*salt) 10.73  
 CV(r\*salt\*Treat) 10.35

**S37b: Analysis of Variance Table for Nitrogen Conc. in root (Cv CCMC)**

| Source             | DF | SS      | MS      | F    | P      |
|--------------------|----|---------|---------|------|--------|
| r                  | 2  | 1.105   | 0.5525  |      |        |
| salt               | 1  | 97.020  | 97.0202 | 3.95 | 0.1853 |
| Error r*salt       | 2  | 49.157  | 24.5787 |      |        |
| Treat              | 3  | 32.943  | 10.9810 | 1.78 | 0.2050 |
| salt*Treat         | 3  | 0.742   | 0.2474  | 0.04 | 0.9888 |
| Error r*salt*Treat | 12 | 74.156  | 6.1797  |      |        |
| Total              | 23 | 255.124 |         |      |        |

Grand Mean 9.8638  
 CV(r\*salt) 50.26  
 CV(r\*salt\*Treat) 25.20

**S38b: Analysis of Variance Table for Phosphorus conc. in shoot (Cv CCMC)**

| Source             | DF | SS      | MS      | F      | P      |
|--------------------|----|---------|---------|--------|--------|
| r                  | 2  | 2.59    | 1.29    |        |        |
| salt               | 1  | 1034.61 | 1034.61 | 533.13 | 0.0019 |
| Error r*salt       | 2  | 3.88    | 1.94    |        |        |
| Treat              | 3  | 190.09  | 63.36   | 18.62  | 0.0001 |
| salt*Treat         | 3  | 18.02   | 6.01    | 1.77   | 0.2072 |
| Error r*salt*Treat | 12 | 40.83   | 3.40    |        |        |
| Total              | 23 | 1290.01 |         |        |        |

Grand Mean 44.203  
 CV(r\*salt) 3.15  
 CV(r\*salt\*Treat) 4.17

**S39b: Analysis of Variance Table for phosphorus Conc. in root (Cv CCMC)**

| Source             | DF | SS      | MS      | F      | P      |
|--------------------|----|---------|---------|--------|--------|
| r                  | 2  | 59.76   | 29.88   |        |        |
| salt               | 1  | 6187.73 | 6187.73 | 629.22 | 0.0016 |
| Error r*salt       | 2  | 19.67   | 9.83    |        |        |
| Treat              | 3  | 1522.77 | 507.59  | 11.16  | 0.0009 |
| salt*Treat         | 3  | 157.76  | 52.59   | 1.16   | 0.3667 |
| Error r*salt*Treat | 12 | 545.95  | 45.50   |        |        |
| Total              | 23 | 8493.63 |         |        |        |

Grand Mean 114.91

CV(r\*salt) 2.73

CV(r\*salt\*Treat) 5.87

**S40b: Analysis of Variance Table for Potassium Conc. in shoot (Cv CCMC)**

| Source             | DF | SS      | MS      | F       | P      |
|--------------------|----|---------|---------|---------|--------|
| r                  | 2  | 7.53    | 3.76    |         |        |
| salt               | 1  | 4041.44 | 4041.44 | 1280.37 | 0.0008 |
| Error r*salt       | 2  | 6.31    | 3.16    |         |        |
| Treat              | 3  | 551.68  | 183.89  | 86.10   | 0.0000 |
| salt*Treat         | 3  | 83.15   | 27.72   | 12.98   | 0.0004 |
| Error r*salt*Treat | 12 | 25.63   | 2.14    |         |        |
| Total              | 23 | 4715.74 |         |         |        |

Grand Mean 77.385

CV(r\*salt) 2.30

CV(r\*salt\*Treat) 1.89

**S41b: Analysis of Variance Table for potassium Conc. in root (Cv CCMC)**

| Source             | DF | SS      | MS      | F       | P      |
|--------------------|----|---------|---------|---------|--------|
| r                  | 2  | 54.08   | 27.04   |         |        |
| salt               | 1  | 5530.99 | 5530.99 | 2398.06 | 0.0004 |
| Error r*salt       | 2  | 4.61    | 2.31    |         |        |
| Treat              | 3  | 94.47   | 31.49   | 2.02    | 0.1654 |
| salt*Treat         | 3  | 928.42  | 309.47  | 19.82   | 0.0001 |
| Error r*salt*Treat | 12 | 187.36  | 15.61   |         |        |
| Total              | 23 | 6799.94 |         |         |        |

Grand Mean 103.67

CV(r\*salt) 1.46

CV(r\*salt\*Treat) 3.81

**S42b: Analysis of Variance Table for sodium conc. in shoot (Cv CCMC)**

| Source             | DF | SS      | MS      | F      | P      |
|--------------------|----|---------|---------|--------|--------|
| r                  | 2  | 17.1    | 8.5     |        |        |
| salt               | 1  | 36075.4 | 36075.4 | 585.50 | 0.0017 |
| Error r*salt       | 2  | 123.2   | 61.6    |        |        |
| Treat              | 3  | 3174.4  | 1058.1  | 83.51  | 0.0000 |
| salt*Treat         | 3  | 2220.1  | 740.0   | 58.40  | 0.0000 |
| Error r*salt*Treat | 12 | 152.1   | 12.7    |        |        |
| Total              | 23 | 41762.3 |         |        |        |

Grand Mean 61.424

CV(r\*salt) 12.78

CV(r\*salt\*Treat) 5.80

**S43b: Analysis of Variance Table for sodium Conc. in root (Cv CCMC)**

| Source             | DF | SS      | MS      | F       | P      |
|--------------------|----|---------|---------|---------|--------|
| r                  | 2  | 8.5     | 4.2     |         |        |
| salt               | 1  | 58428.1 | 58428.1 | 6064.07 | 0.0002 |
| Error r*salt       | 2  | 19.3    | 9.6     |         |        |
| Treat              | 3  | 1839.0  | 613.0   | 105.42  | 0.0000 |
| salt*Treat         | 3  | 913.1   | 304.4   | 52.34   | 0.0000 |
| Error r*salt*Treat | 12 | 69.8    | 5.8     |         |        |
| Total              | 23 | 61277.7 |         |         |        |

Grand Mean 73.204

CV(r\*salt) 4.24

CV(r\*salt\*Treat) 3.29

**S44b: Analysis of Variance Table for K/Na ratio in shoot (CV CCMC)**

| Source             | DF | SS      | MS      | F      | P      |
|--------------------|----|---------|---------|--------|--------|
| r                  | 2  | 0.1770  | 0.0885  |        |        |
| salt               | 1  | 73.8514 | 73.8514 | 473.43 | 0.0021 |
| Error r*salt       | 2  | 0.3120  | 0.1560  |        |        |
| Treat              | 3  | 4.2195  | 1.4065  | 7.56   | 0.0042 |
| salt*Treat         | 3  | 1.7941  | 0.5980  | 3.21   | 0.0616 |
| Error r*salt*Treat | 12 | 2.2331  | 0.1861  |        |        |
| Total              | 23 | 82.5871 |         |        |        |

Grand Mean 2.4327

CV(r\*salt) 16.24

CV(r\*salt\*Treat) 17.73

**S45b: Analysis of Variance Table for K/Na ratio in root (Cv CCMC)**

| Source             | DF | SS      | MS      | F      | P      |
|--------------------|----|---------|---------|--------|--------|
| r                  | 2  | 0.3317  | 0.1659  |        |        |
| salt               | 1  | 47.7795 | 47.7795 | 360.85 | 0.0028 |
| Error r*salt       | 2  | 0.2648  | 0.1324  |        |        |
| Treat              | 3  | 2.5758  | 0.8586  | 31.33  | 0.0000 |
| salt*Treat         | 3  | 1.9665  | 0.6555  | 23.92  | 0.0000 |
| Error r*salt*Treat | 12 | 0.3289  | 0.0274  |        |        |
| Total              | 23 | 53.2474 |         |        |        |

Grand Mean 2.3873

CV(r\*salt) 15.24

CV(r\*salt\*Treat) 6.93
